# Supplementary material
Source: publisher site journal article supplement (https://www.spandidos-publications.com/6848/downloadSupplementary)
Supplement: Supplementary file 1 [file downloadSupplementary]

## Sheet: STableV PSAT1-GeneSignature
Table SV. Common PSAT1-associated genes in EGFR-mutant NSCLC are listed with fold-change (Tumor/Normal), P- and FDR value in the indicated dataset.
A, shPSAT1-downregulated genes
Affymetrix platform		GSE31210				GSE27262			GSE31547-48
Symbol	UniqueID	Fold-change (T-StgI/N)	Fold-change (T-StgII/N)	p-value	FDR	Fold-change (T/N)	p-value	FDR	Fold-change (T/N)	p-value	FDR
ANKRD22	238439_at	5.57366	6.97767	< 1x10-07	< 1x10-07	6.96	< 1x10-07	< 1x10-07	3.63	< 1x10-07	< 1x10-07
	239196_at	4.66137	5.21487	< 1x10-07	< 1x10-07	4.05	< 1x10-07	< 1x10-07	1.69	1e-06	1.65e-06
CDCA7	224428_s_at	5.62848	7.7214	< 1x10-07	< 1x10-07	9.31	< 1x10-07	< 1x10-07	3.86	< 1x10-07	3e-07
	230060_at	3.81331	5.04473	< 1x10-07	< 1x10-07	2.64	1.39e-05	1.61e-05
MCM2	202107_s_at	1.82621	2.46197	< 1x10-07	< 1x10-07	2.92	< 1x10-07	< 1x10-07	1.79	6.17e-05	8.02e-05
MMP15	203365_s_at	2.88438	2.55655	< 1x10-07	< 1x10-07	1.89	1.5e-06	1.94e-06	2.06	< 1x10-07	< 1x10-07
	243883_at	1.16 a	1.72983	0.0130448	0.0149
NETO2	222774_s_at	1.44637	1.89308	0.0015455	0.00185	1.5	0.0195775	0.0205	1.89	4.7e-06	5.64e-06
	218888_s_at								1.75	0.0004305	0.000466
NSUN5	203802_x_at	1.73604	2.06983	< 1x10-07	< 1x10-07	1.7	< 1x10-07	< 1x10-07	1.99	< 1x10-07	< 1x10-07
	213773_x_at					1.59	1.6e-06	1.96e-06	2.1	< 1x10-07	< 1x10-07
PAICS	201014_s_at	1.87086	2.48816	< 1x10-07	< 1x10-07	2.09	< 1x10-07	< 1x10-07	2.03	2.6e-06	5.63e-06
	201013_s_at	1.74405	2.22704	< 1x10-07	< 1x10-07	2.06	< 1x10-07	< 1x10-07	2.12	< 1x10-07	3.25e-07
PSAT1	223062_s_at	3.33356	4.87904	< 1x10-07	< 1x10-07	6.63	< 1x10-07	< 1x10-07	3.02	1.1e-06	1.65e-06
	220892_s_at	1.60198	2.13911	0.000921	0.00116	2.31	1e-07	1.38e-07
SFN	33323_r_at	4.06636	4.53603	< 1x10-07	< 1x10-07	4.04	< 1x10-07	< 1x10-07	2.35	4.9e-06	7.96e-06
	209260_at	5.19407	6.48763	< 1x10-07	< 1x10-07	3.34	1e-07	1.38e-07	2.12	6.3e-06	9.1e-06
	33322_i_at	3.33115	3.79745	< 1x10-07	< 1x10-07	3.49	< 1x10-07	< 1x10-07	2.24	2.3e-06	5.63e-06
SLC39A4	219215_s_at	2.15158	2.2943	6e-07	8.47e-07	1.53	0.0058765	0.00646	1.75	3.4e-06	6.31e-06
SPAG4	219888_at	2.16466	4.58618	< 1x10-07	< 1x10-07	3.58	< 1x10-07	< 1x10-07	1.91	0.000116	0.000137
TYMS	1554696_s_at	1.75412	2.32109	2e-07	3e-07	3.18	< 1x10-07	< 1x10-07
	202589_at	1.68186	2.57369	3.7e-06	4.93e-06	4.1	< 1x10-07	< 1x10-07	1.74	0.00103	0.00103
UHRF1	225655_at	2.01104	3.73086	< 1x10-07	< 1x10-07	6.44	< 1x10-07	< 1x10-07	2.05	0.0004156	0.000416
B, shPSAT1-upregulated Genes
Affymetrix platform		GSE31210				GSE27262			GSE31547-48
Symbol	Probe ID	Fold-Change (T_StgI/N)	Fold-Change (T_StgII/N)	p-value	FDR	Fold-change (T/N)	p-value	FDR	Fold-change (T/N)	p-value	FDR
ALOX5	214366_s_at	0.440234	0.500315	< 1x10-07	< 1x10-07	0.39	4e-07	8.27e-07	0.46	9.45e-05	0.000148
	204446_s_at	0.512944	0.573051	< 1x10-07	< 1x10-07	0.38	< 1x10-07	< 1x10-07	0.36	4.3e-06	1.18e-05
	204445_s_at	0.491124	0.470619	4e-07	9.78e-07	0.5	0.0001162	0.000157
BTG2	201236_s_at	0.84 a	0.597426	0.0028034	0.00441	0.56	0.0008139	0.00105	0.47	0.0001243	0.000182
	201235_s_at					0.59	0.0082555	0.00914	0.56	0.0020228	0.00212
CFD	205382_s_at	0.259488	0.13334	< 1x10-07	< 1x10-07	0.18	< 1x10-07	< 1x10-07	0.25	< 1x10-07	< 1x10-07
EFNB2	202668_at	0.592534	0.598512	1.37e-05	2.51e-05	0.4	< 1x10-07	< 1x10-07	0.57	0.0017784	0.00196
	202669_s_at	0.538441	0.560319	5.9e-05	9.98e-05	0.5	1.5e-06	2.45e-06	0.66	0.0212377	0.0212
FILIP1L	1554965_at	0.451153	0.338199	1.25e-05	2.39e-05
	1554966_a_at					0.45	2.6e-05	3.66e-05
	204135_at					0.47	1.3e-06	2.24e-06	0.61	0.0004475	0.000547
GPRC5A	203108_at	0.571817	0.42183	4e-07	9.78e-07	0.31	< 1x10-07	< 1x10-07	0.46	3.84e-05	7.68e-05
	235563_at	0.497153	0.298765	5e-07	1.16e-06	0.58	0.0008725	0.00108	0.80 a	0.0053186	0.0128
	212444_at	0.620365	0.432555	1.52e-05	2.68e-05	0.41	3e-07	6.64e-07	0.56	0.0010777	0.00125
HBEGF	38037_at	0.360649	0.227645	< 1x10-07	< 1x10-07	0.22	< 1x10-07	< 1x10-07	0.37	1e-07	3.14e-07
	203821_at	0.398878	0.266895	< 1x10-07	< 1x10-07	0.19	< 1x10-07	< 1x10-07	0.34	< 1x10-07	3.14e-07
JAG1	216268_s_at	0.606846	0.604591	< 1x10-07	< 1x10-07	0.67	0.0016553	0.0019	0.54	5.6e-06	1.37e-05
	209099_x_at	0.621185	0.60754	< 1x10-07	< 1x10-07	0.69	0.001226	0.00146	0.61	5.82e-05	9.85e-05
	209098_s_at	0.589924	0.558597	1e-07	2.75e-07	0.73 a	0.0411975	0.0426	0.69	1.19e-05	2.62e-05
S100A9	203535_at	0.589186		0.0003343	0.000545	0.58	0.0383242	0.041	0.42	0.0003819	0.000494
SCEL	232056_at	0.388367	0.23791	9.6e-06	1.92e-05	0.26	< 1x10-07	< 1x10-07	0.47	7.94e-05	0.000238
	1554921_a_at	0.565832	0.416473	0.0030836	0.00468	0.35	2.3e-06	3.4e-06
	206884_s_at	0.521775	0.397268	0.0055734	0.00817	0.28	< 1x10-07	2.38e-07	0.48	0.0001981	0.000272
SPTBN1	200672_x_at	0.419102	0.349682	< 1x10-07	< 1x10-07	0.35	1e-06	1.94e-06	0.4	< 1x10-07	< 1x10-07
	212071_s_at	0.485182	0.332159	< 1x10-07	< 1x10-07	0.39	< 1x10-07	< 1x10-07	0.45	< 1x10-07	< 1x10-07
	215918_s_at	0.130921	0.064259	< 1x10-07	< 1x10-07	0.14	< 1x10-07	< 1x10-07	0.45	< 1x10-07	< 1x10-07
	242220_at	0.331461	0.276276	< 1x10-07	< 1x10-07	0.44	< 1x10-07	< 1x10-07	0.75 a	7.7e-06	3.08e-05
	200671_s_at	0.40144	0.282909	< 1x10-07	< 1x10-07	0.28	< 1x10-07	< 1x10-07	0.31	< 1x10-07	3.14e-07
	226342_at	0.516185	0.459646	< 1x10-07	< 1x10-07	0.41	< 1x10-07	< 1x10-07	0.45	< 1x10-07	< 1x10-07
	226765_at	0.78 a	0.546647	< 1x10-07	2.75e-07	0.49	1.2e-06	2.19e-06	0.42	< 1x10-07	< 1x10-07
	213914_s_at	0.539111	0.55508	2.5e-06	5.5e-06
	214856_at	0.354488	0.277873	5.9e-06	1.24e-05
TJP2	202085_at	0.653284	0.526566	< 1x10-07	< 1x10-07	0.53	2.3e-06	3.4e-06	0.64	4.27e-05	7.83e-05
T, Tumor; N, Normal; T-StgI, Stage I Tumor; T-StgII, Stage II Tumor.
a do not meet the criteria
